# Supplementary figures and images for: The effect of an elastic functional group in a rigid binder framework of silicon–graphite composites on their electrochemical performance
Source: Royal Society of Chemistry journal article supplement (doi:10.1039/c4cp04723k), 2014-11-26

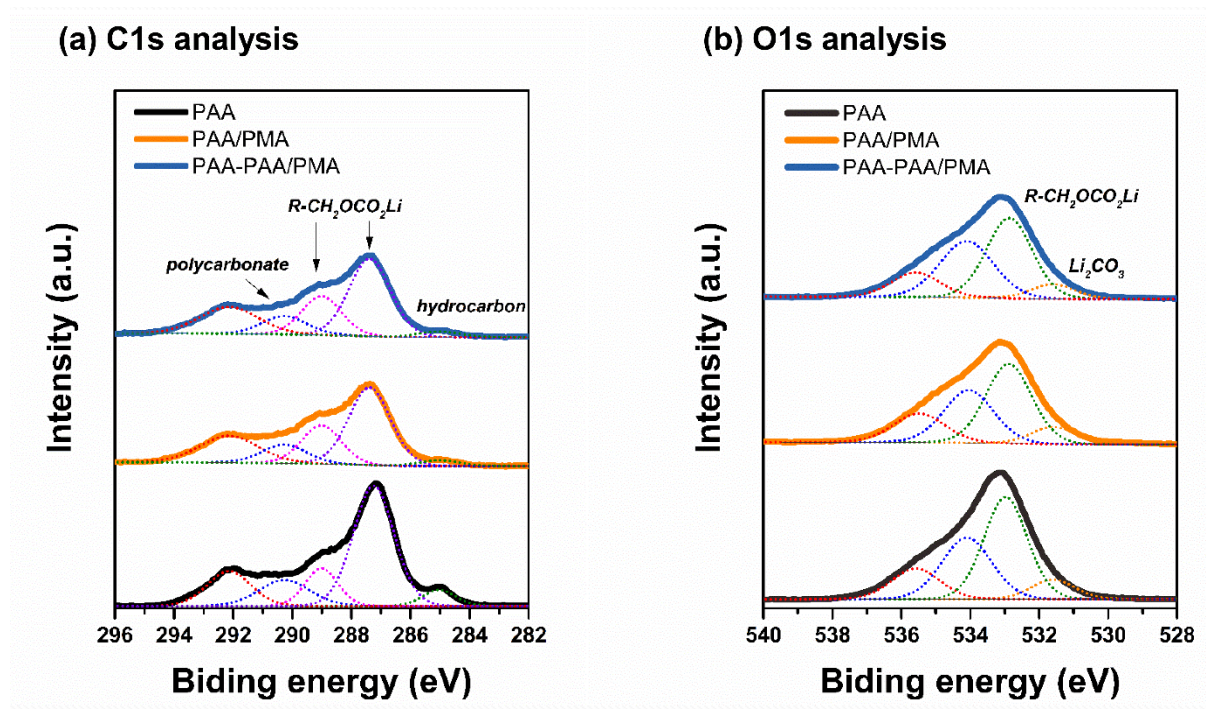

Fig. S1 XPS analytical results for cycled electrode with (a) C1s, and (b) O1s

Supplement: c4cp04723k1.pdf [file c4cp04723k1.pdf]
